# Supplementary material for: The influence of the Or and Carotene Hydroxylase genes on carotenoid accumulation in orange carrots [Daucus carota (L.)]
Source: Springer Nature journal article supplement (doi:10.1007/s00122-021-03901-3), 2021-07-19
Supplement: MOESM2 [file 122_2021_3901_MOESM2_ESM.xlsx]

## Sheet: Table Key
List of Supplementary Tables
Table S1: Genomic coordinates and predicted amino acid changes of SNPs identified within the Or CDS of the wild parent (Z007) relative to the reference genome (representative of cultivated carrots)
Table S2: Phenotypic means, standard deviations (SD), minimum, and maximum values for carotenoids by Or genotypic classes (A = Orc, B = Orw). Values are in µg/g except for beta-carotene : total.
Table S3: Phenotypic means, standard deviations (SD), minimum, and maximum values for carotenoids by environment
Table S4: Summary of the genetic linkage map in cM for the B493 X Z007 F3 Population
Table S5: Summary of the genetic linkage map in physical coordinates for the B493 X Z007 F3 Population
Table S6: Additive effects (in µg/g DW) for significant QTL contributing to variation in carotenoid content, where allele “a” is contributed by B493 and allele “b” is contributed by Z007 in the B493 x Z007 F3 population. Or is located near S3_5091832 on chromosome 3.
Table S7: Chromosomal locations of QTL controlling carotenoids traits in the B493 × Z007 population in the greenhouse environment (WIGH2018). PVE = Percent variance explained.
Table S8: Additive effects (in µg/g DW) for significant QTL contributing to variation in carotenoid content in the greenhouse environment (WIGH2018), where allele “a” is contributed by B493 and allele “b” is contributed by Z007 in the B493 x Z007 F3 population. Or is located near S3_4010876 on chromosome 3.
Table S9: Chromosomal locations of QTL controlling carotenoids traits in the B493 × Z007 population in the field environment (CA2018 and CA2019). PVE = Percent variance explained.
Table S10: Additive effects (in µg/g DW) for significant QTL contributing to variation in carotenoid content in the field environment (CA2018 and CA2019), where allele “a” is contributed by B493 and allele “b” is contributed by Z007 in the B493 x Z007 F3 population. Or is located near S3_4010876 on chromosome 3.
Table S11: Phenotypic means, standard deviations (SD), minimum, and maximum values for carotenoids by CH genotypic classes (A = CHc, B = CHw). Values are in µg/g except for beta-carotene : total.
Table S12: Known carotenoid biosynthetic genes and their physical positions in the genome as reported in Iorizzo et al (2016). CH (Beta-ring caroene hydroxylase) is highlighted in orange.
Table S13: Linkage map constructed for the B493 x Z007 F3 family. Genotypes are in A, B, H format for R/QTL input
Table S14: Phenotypic data for root carotenoid content quantified by HPLC

## Sheet: Table S1
Table S1: Genomic coordinates and predicted amino acid changes of SNPs identified within the Or CDS of the wild parent (Z007) relative to the reference genome (representative of cultivated carrots)
	Genomic Coordinates on Chromosome 3 (bp)
	5194122	5194155	5194159	5194203	5195363	5196203	5197361	5197392	5198774	5199128	5199158	5199161	5199165
Cultivated	G	C	T	C	A	G	T	A	T	T	C	G	T
Amino Acid	Leu	Ser	Ser	I	Leu	Leu	Leu	Leu	Cys	Thr	Pro	Arg	Tyr
Wild	T	T	G	A	G	A	C	G	C	C	G	C	G
Amino Acid	Phe	Ser	Ala	I	Leu	Leu	Ser	Leu	Cys	Thr	Pro	Arg	Asp

## Sheet: Table S2
Table S2: Phenotypic means, standard deviations (SD), minimum, and maximum values for carotenoids by Or genotypic classes (A = Orc, B = Orw). Values are in µg/g except for beta-carotene : total.
Trait	DcOr Genotype	Mean (ug/mg DW) *	SD	Minimum	Maximum
	AA	800.1 a	725.12	0	4096.46
b-carotene	AB	326.2 b	558.29	0	4963.38
	BB	25.7 c	65.44	0	416.3
	AA	110.6 a	288.69	0	1726.27
a-carotene	AB	52.9 b	167.92	0	1575.82
	BB	1.2 b	5.15	0	39.06
	AA	177.5 a	137.63	35.9	892.91
Lutein	AB	149.1 ab	116.84	6.34	936.46
	BB	130.6 b	111.86	20.34	742.42
	AA	123.3 a	110.78	0	547.73
Phytoene	AB	43.3 b	86.72	0	755.24
	BB	1.6 c	7.85	0	50.55
	AA	111.7 a	90.91	0	396.36
z-carotene	AB	31.9 b	53.11	0	337.45
	BB	1.3 c	6.54	0	41.17
	AA	1331.9 a	1153.85	35.9	6823.13
Total Carotenoids	AB	605.3 b	866.4	6.34	7884.1
	BB	160.5 c	144.97	20.34	791.99
	AA	0.6 a	0.12	0	0.76
Beta: Total Carotenoids	AB	0.4 b	0.23	0	0.71
	BB	0.1 c	0.16	0	0.64
* Different letters indicate significant differences between locations based on Tukey's HSD (alpha = 0.05)

## Sheet: Table S3
Table S3: Phenotypic means, standard deviations (SD), minimum, and maximum values for carotenoids by environment
Trait	Location	Mean *	SD	Minimum	Maximum
b-carotene	CA2018	408.6 a	495.36	0	2460.74
	WIGH2018	171.5 b	271.41	0	1579.77
	CA2019	476.4 a	718.33	0	4963.38
a-carotene	CA2018	40.8 a	124.7	0	796.75
	WIGH2018	27.9 b	112.6	0	882.38
	CA2019	74.3 a	230.57	0	1726.27
Lutein	CA2018	105.7 a	49.89	35.9	252.27
	WIGH2018	191.1 b	185.78	14.16	926.46
	CA2019	139.9 a	65.07	6.34	470.45
Phytoene	CA2018	49.5 ab	66.42	0	275.19
	WIGH2018	31.9 b	51.48	0	267.98
	CA2019	66.0 a	113.06	0	755.24
z-carotene	CA2018	40.7 a	58.85	0	220.29
	WIGH2018	34.5 a	56.29	0	355.46
	CA2019	50.4 a	79.71	0	396.36
Total Carotenoids	CA2018	651.1 ab	719.47	35.9	3765.56
	WIGH2018	460.9 a	521.64	14.16	3082.34
	CA2019	809.4 b	1124.31	6.34	7884.1
Beta: Total Carotenoids	CA2018	0.5 a	0.23	0	0.76
	WIGH2018	0.3 b	0.21	0	0.62
	CA2019	0.4 a	0.26	0	0.74
* Different letters indicate significant differences between locations based on Tukey's HSD (alpha = 0.05)

## Sheet: Table S4
Table S4: Summary of the genetic linkage map in cM for the B493 X Z007 F3 Population
Linkage group	Number of markers	Length of linkage group (cM)	Average spacing (cM)
1	232	113.52	0.48931
2	421	202.23	0.480356
3	449	239.26	0.532873
4	476	214.67	0.450987
5	153	111.53	0.728954
6	365	159.7	0.437534
7	75	64.32	0.8576
8	290	176.52	0.60869
9	110	102.61	0.932818
Overall	2571	1384.36	0.613236

## Sheet: Table S5
Table S5: Summary of the genetic linkage map in physical coordinates for the B493 X Z007 F3 Population
Chromosome	Number of markers	Length of chromosome (Mb)	Average spacing (kb)
1	232	51.3	221.121
2	421	43.8	104.038
3	449	50.1	111.581
4	476	35.7	75
5	153	41.9	273.856
6	365	36.5	100
7	75	36.2	482.667
8	290	31.7	109.31
9	110	33.4	303.636
Overall	2571	360.6	140.257

## Sheet: Table S6
Table S6: Additive effects (in µg/g DW) for significant QTL contributing to variation in carotenoid content, where allele “A” is contributed by B493 and allele “B” is contributed by Z007 in the B493 x Z007 F3 population. Or is located near S3_5091832 on chromosome 3.
Trait	Chromosome	Marker		Genotype		Additive Effect
			aa	ab	bb
b-carotene	2	S2_35336303	570.89	328.05	137.87	-233.1
	3	S3_4408266	759.331	318.276	12.7131	-397.34
	7	S7_6961456	826.396	288.103	232.258	-334.76
a-carotene	3	S3_16337133	281.087	3.92871	1.39915	-54.08
	7	S7_6195852	16.4364	10.44	11.8218	-141.77
Lutein	2	S2_42125003	205.59	134.933	112.756	-46.5
Phytoene	2	S2_34544080	83.6034	46.0335	17.6802	-35.81
	3	S3_4798330	116.712	43.3939	1.31651	-61.4
	7	S7_6961456	112.15	42.5107	33.955	-45
z-carotene	2	S2_35336303	66.879	40.2851	14.5285	-25.84
	3	S3_4010876	108.209	30.5082	0	-56.25
	7	S7_6195852	65.7221	43.0329	33.4491	-19.3
Total Carotenoids	2	S2_32454540	1407.27	557.824	432.567	-357.17
	3	S3_4010876	1308.24	580.357	143.493	-598.6
	7	S7_6195738	1407.67	557.865	432.299	-536.57
Beta : Total	2	S2_13504076	0.445271	0.371951	0.248643	-0.1
	3	S3_4408266	0.568499	0.39348	0.0683544	-0.26
	7	S7_12987570	0.444373	0.361532	0.343968	-0.08

## Sheet: Table S7
Table S7: Chromosomal locations of QTL controlling carotenoids traits in the B493 × Z007 population in the greenhouse environment (WIGH2018). PVE = Percent variance explained.
Trait	QTL Name	Position (cM)	LOD	PVE	Closest Marker	1.5 LOD Interval	1.5 LOD Physical Position	Interval (Mb)
(Chromosome)
b-carotene
3	bt-3.1	36	17.7	36.6	S3_4798330	33 - 65	4282878 - 6640786	2.4
7	bt-7.1	34	11	14.8	S7_6961456	32 - 37	6229461 - 15074687	8.8
a-carotene
7	al-7.1	34	12.12	31	S7_6195852	28 - 34	6195852 - 6961456	0.8
Phytoene
3	pt-3.1	21	16.4	21.5	S3_2526228	13 - 58	1867421 - 6265292	4.4
z-carotene
3	zt-3.1	31	14.35	36.4	S3_4002091	13 - 88	1867496 - 9743797	7.9
Total Carotenoids
2	tl-2.1	182	4.6	9.3	S2_41100281	144 - 191	37875188 - 42125003	4.2
3	tl-3.1	31	11.2	25.4	S3_4002091	19 - 66	2501427 - 6641849	4.1
b -carotene:Total
2	rt-2.1	32	6.2	7.1	S2_13004435	20 - 86	9955731 - 29517487	19.6
3	rt-3.1	33	32.65	31.7	S3_4282878	32 - 38	4282878 - 4812587	0.5

## Sheet: Table S8
Table S8: Additive effects (in µg/g DW) for significant QTL contributing to variation in carotenoid content in the greenhouse environment (WIGH2018), where allele “a” is contributed by B493 and allele “b” is contributed by Z007 in the B493 x Z007 F3 population. Or is located near S3_4798330 on chromosome 3.
Trait	Chromosome	Marker		Genotype		Additive Effect
			aa	ab	bb
b-carotene	3	S3_4798330	437.71	124.605	8.66612	-219.11
	7	S7_6961456	412.81	139.086	106.95	-165.25
a-carotene	7	S7_6195852	170.914	1.63838	0	-88.746
Phytoene	2	S3_2526228	83.4512	18.7735	0	-41.726
z-carotene	3	S3_4002091	88.5407	23.7319	0	-44.32
Total Carotenoids	2	S2_41100281	724.094	366.796	212.028	-189.9
	3	S3_4002091	925.529	364.034	170.746	-343.34
b -carotene:Total	2	S2_13004435	0.315646	0.270118	0.115898	-0.083128
	3	S3_4282878	0.475799	0.261015	0.0250086	-0.221392

## Sheet: Table S9
Table S9: Chromosomal locations of QTL controlling carotenoids traits in the B493 × Z007 population in the field environment (CA2018 and CA2019). PVE = Percent variance explained.
Trait	QTL Name	Position (cM)	LOD	PVE	Closest Marker	1.5 LOD Interval	1.5 LOD Physical Position	Interval (Mb)
(Chromosome)
b-carotene
2	bt-2.1	113	15.38	12.14	S3_34781951	104 - 182	32454540 - 41100281	8.6
3	bt-3.1	31.7	29.1	25.55	S3_4010876	29 - 49	3905395 - 6064806	2.1
7	bt-7.1	31	22.2	18.46	S7_6195852	25 - 37	6195852 - 15074687	8.8
a-carotene
7	al-7.1	30	31	36.2	S7_6195852	30 - 34	6195852 - 6961456	0.8
Lutein
2	lt.2.1	105.5	9.7	12.4	S2_33367777	94 - 202	29853818 - 43638026	13.8
3	lt.3.1	30.6	7.2	8.9	S3_4075544	6 - 108	1253539 - 13203854	12
Phytoene
2	pt-2.1	113.7	12.2	10.9	S2_34781951	103 - 138	31676876 - 37778121	6.1
3	pt-3.1	31.7	23.8	23.3	S3_4010876	30 - 95	3905395 - 11925157	8
7	pt-7.1	30.68	14.82	13.6	S7_6195852	24 - 38	6195852 - 15074687	8.9
z-carotene
2	zt-2.1	113	11.5	9.9	S2_34781951	101 - 182	31575783 - 41100281	9.5
3	zt-3.1	31	34	34.7	S3_4010876	30 - 49	4034933 - 6064806	2
7	zt-7.1	30.7	6.8	5.6	S7_6195852	21 - 41	6195852 - 16583100	10.4
Total Carotenoids
2	tl-2.1	113	14.1	11.32	S2_34781951	104 - 176	32454540 - 40259573	7.8
3	tl-3.1	31.7	26.2	26.2	S3_4010876	30 - 49	4075544 - 6061752	1.9
7	tl-7.1	30	23.3	23	S7_6195852	25 - 37	6195852 - 15074687	8.9
b -carotene:Total
2	rt-2.1	95.9	17	10.3	S2_29481387	35 - 100	13027636 - 30831084	17.8
3	rt-3.1	40	61	52.8	S3_4807069	33 - 52	4405855 - 6157827	1.8
7	rt-7.1	29	11	6.4	S7_6195852	22 - 41	6195852 - 16583100	10.4

[truncated: 5 more sheets: Table S10, Table S11, Table S12, Table S13, Table S14]
